# Supplementary material
Source: publisher figshare collection journal article supplement (https://tandf.figshare.com/articles/dataset/_/13210554)
Supplement: Supplementary file 2 [file 2]

# Package ‘sparsevb’

October 5, 2020

**Type** Package

**Title** Spike-and-Slab Variational Bayes for Linear and Logistic Regression

**Version** 0.1.0

**Date** 2020-09-29

**Author** Gabriel J. Clara [aut, cre], Botond Szabo [aut], Kolyan Ray [aut]

**Maintainer** Gabriel J. Clara <gabriel.j.clara@gmail.com>

**Description** Implements variational Bayesian algorithms to perform scalable variable selection for sparse, high-dimensional linear and logistic regression. Features include a novel prioritized updating scheme, which computes a preliminary estimator for the variational means during initialization and generates an update order prioritizing large coefficients. Sparsity is induced via spike-and-slab priors with either Laplace or Gaussian slabs. By default, the heavier-tailed Laplace density is used.

**BugReports** <https://gitlab.com/gclara/varpack/-/issues>

**License** GPL (>= 3)

**Imports** Rcpp (>= 1.0.5), selectiveInference (>= 1.2.5)

**LinkingTo** Rcpp, RcppArmadillo, RcppEnsmallen

**SystemRequirements** C++11

**Encoding** UTF-8

**RoxygenNote** 7.1.1

## R topics documented:

|                  |   |
|------------------|---|
| sparsevb-package | 2 |
| svb.fit          | 2 |
| Index            | 6 |

---

|                  |                                                                                      |
|------------------|--------------------------------------------------------------------------------------|
| sparsevb-package | <i>sparsevb: Spike-and-Slab Variational Bayes for Linear and Logistic Regression</i> |
|------------------|--------------------------------------------------------------------------------------|

---

## Description

Implements variational Bayesian algorithms to perform scalable variable selection for sparse, high-dimensional linear and logistic regression. Features include a novel prioritized updating scheme, which computes a preliminary estimator for the variational means during initialization and generates an update order prioritizing large coefficients. Sparsity is induced via spike-and-slab priors with either Laplace or Gaussian slabs. By default, the heavier-tailed Laplace density is used.

## Details

For details as they pertain to using the package, consult the [svb.fit](#) function help page. Detailed descriptions and derivations of the variational algorithms with Laplace slabs may be found in the references.

## Author(s)

**Maintainer:** Gabriel J. Clara <gabriel.j.clara@gmail.com>

Authors:

- Botond Szabo
- Kolyan Ray

## References

- Ray K. and Szabo B. Variational Bayes for high-dimensional linear regression with sparse priors. (2019). *arXiv: 1904.07150 [stat.ME]*.
- Ray K., Szabo B., and Clara G. J. Spike and slab variational Bayes for high dimensional logistic regression. (2020). *Advances in Neural Information Processing Systems* 33.

## See Also

Useful links:

- Report bugs at <https://gitlab.com/gclara/varpack/-/issues>

---

|         |                                                                        |
|---------|------------------------------------------------------------------------|
| svb.fit | <i>Fit Approximate Posteriors to Sparse Linear and Logistic Models</i> |
|---------|------------------------------------------------------------------------|

---

## Description

Main function of the [sparsevb](#) package. Computes mean-field posterior approximations for both linear and logistic regression models, including variable selection via sparsity-inducing spike and slab priors.

**Usage**

```
svb.fit(
  X,
  Y,
  family = c("linear", "logistic"),
  slab = c("laplace", "gaussian"),
  mu,
  sigma,
  gamma,
  alpha = 1,
  beta,
  lambda = 1,
  update_order,
  prioritized_init = TRUE,
  exact_math = FALSE,
  rescale = TRUE,
  ridge_penalty = 0.1,
  max_iter = 1000,
  tol = 1e-05
)
```

**Arguments**

|                  |                                                                                                                                                                                                                                                                                                                                   |
|------------------|-----------------------------------------------------------------------------------------------------------------------------------------------------------------------------------------------------------------------------------------------------------------------------------------------------------------------------------|
| X                | A numeric design matrix, each row of which represents a data point.                                                                                                                                                                                                                                                               |
| Y                | An $nrow(X)$ -dimensional response vector, numeric if family = "linear" and binary if family = "logistic".                                                                                                                                                                                                                        |
| family           | A character string selecting the regression model, either "linear" or "logistic".<br>( <i>default</i> : "linear")                                                                                                                                                                                                                 |
| slab             | A character string specifying the prior slab density, either "laplace" or "gaussian".<br>( <i>default</i> : "laplace")                                                                                                                                                                                                            |
| mu               | An $ncol(X)$ -dimensional numeric vector, serving as initial guess for the variational means. ( <i>default</i> : $rep(0, ncol(X))$ )                                                                                                                                                                                              |
| sigma            | A positive $ncol(X)$ -dimensional numeric vector, serving as initial guess for the variational standard deviations. ( <i>default</i> : $rep(1, ncol(X))$ )                                                                                                                                                                        |
| gamma            | An $ncol(X)$ -dimensional vector of probabilities, serving as initial guess for the variational inclusion probabilities. ( <i>default</i> : $rep(alpha/(alpha+beta), ncol(X))$ )                                                                                                                                                  |
| alpha            | A positive numeric value, used by the Beta-hyperprior. ( <i>default</i> : 1.0)                                                                                                                                                                                                                                                    |
| beta             | A positive numeric value, used by the Beta-hyperprior. ( <i>default</i> : $ncol(X)$ )                                                                                                                                                                                                                                             |
| lambda           | A numeric value, controlling the scale parameter of the prior slab density. Used as the inverted scale parameter when prior = "laplace" (default) and the standard deviation if prior = "gaussian". ( <i>default</i> : 1.0)                                                                                                       |
| update_order     | A permutation of $1:ncol(X)$ , giving the update order of the coordinate-ascent algorithm. Setting this parameter when prioritized_init = TRUE has no effect; it will be overwritten. ( <i>default</i> : $1:ncol(X)$ )                                                                                                            |
| prioritized_init | A Boolean value, controlling whether the ridge regression estimator for mu should be computed during initialization. When TRUE, the argument mu serves as initial guess for the ridge regression estimator and update_order is overwritten by ranking the elements the estimator according to magnitude. ( <i>default</i> : TRUE) |

|                            |                                                                                                                                                                                                            |
|----------------------------|------------------------------------------------------------------------------------------------------------------------------------------------------------------------------------------------------------|
| <code>exact_math</code>    | A Boolean variable, controlling if the linear ridge regression estimator should be computed in closed form or iteratively. Has no effect when <code>family = "logistic"</code> . ( <i>default</i> : FALSE) |
| <code>rescale</code>       | A Boolean variable, controlling if X and Y should be rescaled by the estimated variance of the underlying noise. Has no effect when <code>family = "logistic"</code> . ( <i>default</i> : TRUE)            |
| <code>ridge_penalty</code> | A positive numerical value, controlling the importance of the penalty term when computing the ridge regression estimator. ( <i>default</i> : 0.1)                                                          |
| <code>max_iter</code>      | A positive integer, controlling the maximum number of iterations for the variational update loop. ( <i>default</i> : 1000)                                                                                 |
| <code>tol</code>           | A positive numerical value, controlling the termination criterion for maximum absolute differences between binary entropies of successive iterates. ( <i>default</i> : 10e-6)                              |

### Details

Suppose  $\theta$  is the  $p$ -dimensional true parameter. The spike-and-slab prior for  $\theta$  may be represented by the hierarchical scheme

$$\begin{aligned} w &\sim \text{Beta}(\alpha, \beta) \\ z_j &| w \sim_{i.i.d.} \text{Bernoulli}(w) \\ \theta_j &| z_j \sim_{ind.} (1 - z_j)\delta_0 + z_j g. \end{aligned}$$

As usual,  $\delta_0$  represents the Dirac measure at 0. The slab  $g$  may be taken either as a  $\text{Laplace}(0, \lambda^{-1})$  or  $N(0, \lambda^2)$  density.

### Value

The approximate mean-field posterior, given as a named list containing numeric vectors "mu", "sigma", and "gamma". In mathematical terms,

$$\theta_j | \mu_j, \sigma_j, \gamma_j \sim_{ind.} \gamma_j N(\mu_j, \sigma^2) + (1 - \gamma_j)\delta_0.$$

### Examples

```
## Not run:

### Simulate a linear regression problem of size n times p, with sparsity level s ###

n <- 2500
p <- 5000
s <- 25

### Generate toy data ###

X <- matrix(rnorm(n*p), n, p) #standard Gaussian design matrix

theta <- numeric(p)
theta[sample.int(p, s)] <- runif(s, -3, 3) #sample non-zero coefficients in random locations

pos_TR <- as.numeric(theta != 0) #true positives

Y <- X %*% theta + rnorm(n) #add standard Gaussian noise
```

```
### Run the algorithm in linear mode with Laplace prior and prioritized initialization ###
test <- svb.fit(X, Y, family = "linear")

posterior_mean <- test$mu * test$gamma #approximate posterior mean

pos <- as.numeric(test$gamma > 0.5) #significant coefficients

### Assess the quality of the posterior estimates ###

TPR <- sum(pos[which(pos_TR == 1)])/sum(pos_TR) #True positive rate

FDR <- sum(pos[which(pos_TR != 1)])/max(sum(pos), 1) #False discovery rate

L2 <- sqrt(sum((posterior_mean - theta)^2)) #L_2-error

MSPE <- sqrt(sum((X %*% posterior_mean - Y)^2)/n) #Mean squared prediction error

## End(Not run)
```

# Index

`sparsevb`, [2](#)  
`sparsevb (sparsevb-package)`, [2](#)  
`sparsevb-package`, [2](#)  
`svb.fit`, [2](#), [2](#)
